# Supplementary material for: Transcriptional profiles in the chicken ductus arteriosus during hatching
Source: PubMed Central journal article supplement (PMC6428269; doi:10.1371/journal.pone.0214139), 2019-03-21
Supplement: pone.0214139.s001.pdf [file pone.0214139.s001.pdf]

**S1 Table. Top 30 genes with high proximal DA/aorta ratio.**

| Gene name                                                    | Gene symbol    | Fold Change (proDA/aorta) | NCBI ref seq | Probe ID | gene ID |
|--------------------------------------------------------------|----------------|---------------------------|--------------|----------|---------|
| tenascin C                                                   | <i>tnc</i>     | 2.15                      | NM_205456    | 15439065 | 396440  |
| collagen, type VIII, alpha 1                                 | <i>col8a1</i>  | 1.98                      |              | 15403120 | 418378  |
| family with sequence similarity 132, member A                | <i>fam132a</i> | 1.82                      | XM_417583    | 15468686 | 419422  |
| transcription factor AP-2 beta                               | <i>tfap2b</i>  | 1.70                      | XM_417583    | 15500239 | 395713  |
| family with sequence similarity 13, member C                 | <i>fam13c</i>  | 1.69                      |              | 15524862 | 423602  |
| regulator of G-protein signaling 16                          | <i>rgs16</i>   | 1.68                      | BX931668     | 15538900 | 424409  |
| serine peptidase inhibitor, Kazal type 5                     | <i>spink5</i>  | 1.59                      | NM_001030612 | 15423382 | 416235  |
| desmin                                                       | <i>des</i>     | 1.58                      |              | 15536995 | 395906  |
| calcium channel, voltage-dependent, T type, alpha 1H subunit | <i>cacna1h</i> | 1.57                      |              | 15429785 | 416526  |
| hematopoietic prostaglandin D synthase                       | <i>hpgds</i>   | 1.56                      | NM_205011    | 15509514 | 395863  |
| G protein-coupled receptor 20                                | <i>gpr20</i>   | 1.56                      |              | 15464028 | 428381  |
| solute carrier family 38, member 4                           | <i>slc38a4</i> | 1.55                      | NM_001199549 | 15398648 | 417809  |
| tenascin C                                                   | <i>tnc</i>     | 1.54                      | X73833       | 15439092 | 396440  |
| glycoprotein (transmembrane) nmb                             | <i>gpnmB</i>   | 1.54                      |              | 15450041 | 428431  |

|                                                                                   |                |      |              |          |        |
|-----------------------------------------------------------------------------------|----------------|------|--------------|----------|--------|
| clone ChEST566j15                                                                 |                | 1.54 | CR385930     | 15517930 |        |
| tyrosinase (oculocutaneous albinism IA)                                           | <i>tyr</i>     | 1.54 | NM_204160    | 15408323 | 373971 |
| phytanoyl-CoA 2-hydroxylase interacting protein-like                              | <i>phyhipl</i> | 1.53 | NM_001199504 | 15528343 | 423603 |
| c-fos induced growth factor (vascular endothelial growth factor D)                | <i>figf</i>    | 1.50 | NM_204568    | 15393053 | 395255 |
| GDNF family receptor alpha 1                                                      | <i>gfra1</i>   | 1.48 | NM_205102    | 15530884 | 395994 |
| forkhead box F1                                                                   | <i>foxf1</i>   | 1.48 | AB028627     | 15417901 | 395624 |
| tyrosinase-related protein 1                                                      | <i>tyrp1</i>   | 1.48 | NM_205045    | 15558998 | 395913 |
| ankyrin repeat domain 1 (cardiac muscle)                                          | <i>ankrd1</i>  | 1.47 | NM_204405    | 15529946 | 378926 |
| matrix metalloproteinase 11 (stromelysin 3)                                       | <i>mmp11</i>   | 1.47 |              | 15432843 | 769489 |
| MAM domain containing 2                                                           | <i>mamdc2</i>  | 1.47 | BX935251     | 15559233 | 427247 |
| transgelin                                                                        | <i>tagln</i>   | 1.45 |              | 15475181 | 396490 |
| matrix Gla protein                                                                | <i>mgp</i>     | 1.45 | NM_205044    | 15387274 | 395912 |
| cytokine-like 1                                                                   | <i>cytl1</i>   | 1.45 | BX931297     | 15512352 | 422849 |
| potassium large conductance calcium-activated channel, subfamily M, beta member 2 | <i>kcnmb2</i>  | 1.45 | BX950825     | 15549669 | 770907 |
| dopachrome tautomerase (dopachrome delta-isomerase, tyrosine-related protein 2)   | <i>dct</i>     | 1.44 | NM_204935    | 15394509 | 395775 |
