# Supplementary material for: Transcriptional profiles in the chicken ductus arteriosus during hatching
Source: PubMed Central journal article supplement (PMC6428269; doi:10.1371/journal.pone.0214139), 2019-03-21
Supplement: pone.0214139.s002.pdf [file pone.0214139.s002.pdf]

**S2 Table. Top 30 genes with high distal DA/aorta ratio.**

| Gene name                                                    | Gene symbol    | Fold Change (disDA/aorta) | NCBI ref seq | Probe ID | gene ID |
|--------------------------------------------------------------|----------------|---------------------------|--------------|----------|---------|
| tenascin C                                                   | <i>tnc</i>     | 1.82                      | NM_205456    | 15439065 | 396440  |
| collagen, type VIII, alpha 1                                 | <i>col8a1</i>  | 1.69                      |              | 15403120 | 418378  |
| family with sequence similarity 132, member A                | <i>fam132a</i> | 1.59                      | XM_417583    | 15468686 | 419422  |
| family with sequence similarity 13, member C                 | <i>fam13c</i>  | 1.59                      |              | 15524862 | 423602  |
| G protein-coupled receptor 20                                | <i>gpr20</i>   | 1.45                      |              | 15464028 | 428381  |
| phytanoyl-CoA 2-hydroxylase interacting protein-like         | <i>phyhipl</i> | 1.44                      | NM_001199504 | 15528343 | 423603  |
| desmin                                                       | <i>des</i>     | 1.41                      |              | 15536995 | 395906  |
| calcium channel, voltage-dependent, T type, alpha 1H subunit | <i>cacna1h</i> | 1.40                      |              | 15429785 | 416526  |
| clone ChEST566j15                                            |                | 1.38                      |              | 15517930 |         |
| matrix Gla protein                                           | <i>mgp</i>     | 1.38                      | NM_205044    | 15387274 | 395912  |
| tenascin                                                     | <i>tnc</i>     | 1.37                      | X73833       | 15439092 | 396440  |
| melanocortin 5 receptor                                      | <i>mc5r</i>    | 1.36                      | NM_001031015 | 15461279 | 421047  |
| regulator of G-protein signaling 16                          | <i>rgs16</i>   | 1.35                      |              | 15538900 | 424409  |
| G protein-coupled receptor 126                               | <i>gpr126</i>  | 1.35                      | NM_001031071 | 15497320 | 421673  |

|                                                                                |                |      |              |          |           |
|--------------------------------------------------------------------------------|----------------|------|--------------|----------|-----------|
| ATPase, Ca <sup>++</sup> transporting, ubiquitous                              | <i>atp2a3</i>  | 1.33 | NM_204891    | 15444194 | 395707    |
| serine peptidase inhibitor, Kazal type 5                                       | <i>spink5</i>  | 1.33 | NM_001030612 | 15423382 | 416235    |
| kinase insert domain receptor (a type III receptor tyrosine kinase)            | <i>kdr</i>     | 1.32 | NM_001004368 | 15505176 | 395323    |
| transgelin                                                                     | <i>tagln</i>   | 1.32 |              | 15475181 | 396490    |
| family with sequence similarity 20, member C                                   | <i>fam20c</i>  | 1.32 |              | 15426628 | 416445    |
| leucine-rich repeat containing G protein-coupled receptor 5                    | <i>lgr5</i>    | 1.32 |              | 15386401 | 427867    |
| solute carrier family 38, member 4                                             | <i>slc38a4</i> | 1.32 | NM_001199549 | 15398648 | 417809    |
| G protein-coupled receptor 116                                                 | <i>gpr116</i>  | 1.31 |              | 15500349 | 422061    |
| transcription factor AP-2 beta<br>(activating enhancer binding protein 2 beta) | <i>tfap2b</i>  | 1.31 | NM_204895    | 15500239 | 395713    |
| von Willebrand factor                                                          | <i>vwf</i>     | 1.31 |              | 15401973 | 419031    |
| microRNA mir-1645                                                              | <i>mir1645</i> | 1.29 | NR_035136    | 15398276 | 100316010 |
| c-fos induced growth factor (vascular endothelial growth factor D)             | <i>figf</i>    | 1.29 | NM_204568    | 15393053 | 395255    |
| nidogen 1                                                                      | <i>nid1</i>    | 1.28 |              | 15488286 | 395531    |
| four and a half LIM domains 2                                                  | <i>fhl2</i>    | 1.27 | BX933997     | 15405749 | 418726    |
| microRNA mir-27b                                                               | <i>mir27b</i>  | 1.27 | NR_031497    | 15559626 | 777878    |
