# Supplementary material for: Transcriptional profiles in the chicken ductus arteriosus during hatching
Source: PubMed Central journal article supplement (PMC6428269; doi:10.1371/journal.pone.0214139), 2019-03-21
Supplement: pone.0214139.s003.pdf [file pone.0214139.s003.pdf]

**S3 Table. Top 30 genes with low proximal DA/aorta ratio.**

| Gene name                                                                     | Gene symbol     | Fold change (proDA/aorta) | NCBI ref seq | Probe ID | gene ID   |
|-------------------------------------------------------------------------------|-----------------|---------------------------|--------------|----------|-----------|
| microRNA 1329                                                                 | <i>mir1329</i>  | 0.64                      | NR_035009    | 15492062 | 100315694 |
| solute carrier family 1 (glial high affinity glutamate transporter), member 3 | <i>slc1a3</i>   | 0.67                      |              | 15557705 | 395443    |
| guanylate cyclase 1 soluble subunit alpha                                     | <i>gucy1a3</i>  | 0.67                      | BX933178     | 15502379 | 422407    |
| angiotensin I converting enzyme                                               | <i>ace</i>      | 0.68                      | NM_001167732 | 15480996 | 419953    |
| spermatogenesis associated 13                                                 | <i>spata13</i>  | 0.69                      | CR389315     | 15395669 | 418940    |
| opioid receptor, mu 1                                                         | <i>oprm1</i>    | 0.69                      |              | 15489262 | 421644    |
| spermatogenesis associated 13                                                 | <i>spata13</i>  | 0.70                      |              | 15395671 | 418940    |
| clone 840 GGN101 snoRNA                                                       |                 | 0.70                      | EU240316     | 15536100 |           |
| family with sequence similarity 46, member C                                  | <i>fam46</i>    | 0.70                      | NM_001007972 | 15402678 | 426544    |
| GLIS family zinc finger 1                                                     | <i>glis1</i>    | 0.71                      |              | 15544262 | 424652    |
| heparanase 2                                                                  | <i>hpse2</i>    | 0.71                      | XM_421704    | 15526875 | 423834    |
| papilin, proteoglycan-like sulfated glycoprotein                              | <i>papln</i>    | 0.72                      |              | 15521735 | 42887     |
| protein tyrosine phosphatase, receptor type, O                                | <i>ptpro</i>    | 0.72                      | NM_204122    | 15389071 | 373911    |
| KIAA1644                                                                      | <i>kiaa1644</i> | 0.74                      |              | 15401776 | 100857276 |

|                                                                            |                  |      |              |          |        |
|----------------------------------------------------------------------------|------------------|------|--------------|----------|--------|
| adenylate cyclase activating polypeptide 1 (pituitary) receptor type I     | <i>adcyap1r1</i> | 0.74 | NM_001098606 | 15448093 | 420386 |
| alpha-1,4-N-acetylglucosaminyltransferase                                  | <i>a4gnt</i>     | 0.74 | XM_426692    | 15545524 | 429136 |
| hepatocyte growth factor (hepapoietin A; scatter factor)                   | <i>hgf</i>       | 0.74 | NM_001030370 | 15384844 | 395941 |
| CUB and Sushi multiple domains 1                                           | <i>csmd1</i>     | 0.74 |              | 15491766 | 421899 |
| gamma-aminobutyric acid (GABA) A receptor, beta 2                          | <i>gabrb2</i>    | 0.75 | X72806       | 15422949 | 414890 |
| collagen, type XV, alpha 1                                                 | <i>col15a1</i>   | 0.75 |              | 15451458 | 420803 |
| protein phosphatase 4, regulatory subunit 4                                | <i>ppp4r4</i>    | 0.75 | XM_421339    | 15517524 | 423430 |
| single-minded homolog 2 (Drosophila)                                       | <i>sim2</i>      | 0.75 | XM_416724    | 15392089 | 418515 |
| neuropeptide Y                                                             | <i>npy</i>       | 0.76 | NM_205473    | 15450094 | 396464 |
| family with sequence similarity 19 (chemokine (C-C motif)-like), member A2 | <i>fam19a2</i>   | 0.76 |              | 15398714 | 771745 |
| Ig heavy chain V-III region VH26-like                                      | <i>loc430014</i> | 0.76 |              | 15554626 | 430014 |
| collagen, type XXI, alpha 1                                                | <i>col21a1</i>   | 0.76 |              | 15491621 | 421885 |
| family with sequence similarity 110, member B                              | <i>fam110b</i>   | 0.76 | XM_419215    | 15453999 | 421134 |
| ATPase, H <sup>+</sup> transporting, lysosomal 42kDa, V1 subunit C2        | <i>atp6v1c2</i>  | 0.76 | XM_419951    | 15492047 | 421939 |
| collagen, type XXIII, alpha 1                                              | <i>col23a1</i>   | 0.76 |              | 15424012 | 425481 |
| leucine rich repeat containing 8 family, member B                          | <i>lrrc8b</i>    | 0.77 |              | 15543240 | 424516 |
