# Supplementary material for: Transcriptional profiles in the chicken ductus arteriosus during hatching
Source: PubMed Central journal article supplement (PMC6428269; doi:10.1371/journal.pone.0214139), 2019-03-21
Supplement: pone.0214139.s004.pdf [file pone.0214139.s004.pdf]

**S4 Table. Top 30 genes with low distal DA/aorta ratio.**

| Gene name                                                                     | Gene symbol      | Fold change (disDA/aorta) | NCBI ref seq | Probe ID | gene ID   |
|-------------------------------------------------------------------------------|------------------|---------------------------|--------------|----------|-----------|
| microRNA mir-1329                                                             | <i>mir1329</i>   | 0.68                      | NR_035009    | 15492062 | 100315694 |
| GGN101 snoRNA                                                                 |                  | 0.69                      | EU240316     | 15536100 |           |
| GLIS family zinc finger 1                                                     | <i>glis1</i>     | 0.70                      | XM_015291201 | 15544262 | 424652    |
| solute carrier family 1 (glial high affinity glutamate transporter), member 3 | <i>slc1a3</i>    | 0.73                      |              | 15557705 | 395443    |
| snail homolog 2 (Drosophila)                                                  | <i>snai2</i>     | 0.74                      | CR407272     | 15551818 | 432368    |
| protein phosphatase 4, regulatory subunit 4                                   | <i>ppp4r4</i>    | 0.74                      | XM_421339    | 15517524 | 423430    |
| ATPase, H <sup>+</sup> transporting, lysosomal 42kDa, V1 subunit C            | <i>atp6v1c2</i>  | 0.74                      | XM_419951    | 15492047 | 42193     |
| beta-defensin 12                                                              | <i>gal12</i>     | 0.76                      | NM_00100160  | 15500179 | 414339    |
| spermatogenesis associated 13                                                 | <i>spata13</i>   | 0.76                      |              | 15395671 | 418940    |
| adenylate cyclase activating polypeptide 1 (pituitary) receptor type I        | <i>adcyap1r1</i> | 0.77                      | NM_001098606 | 15448093 | 420386    |
| spermatogenesis associated 13                                                 | <i>spata13</i>   | 0.77                      | CR389315     | 15395669 | 418940    |
| transmembrane protein 71                                                      | <i>tmem71</i>    | 0.78                      | XM_025148183 | 15463797 | 101749956 |
| snail homolog 2 (Drosophila)                                                  | <i>snai2</i>     | 0.78                      | CR407272     | 15462084 | 432368    |
| KIAA1644                                                                      | <i>kiaa1644</i>  | 0.78                      |              | 15401776 | 100857276 |

|                                                                         |                |      |              |          |        |
|-------------------------------------------------------------------------|----------------|------|--------------|----------|--------|
| CUB and Sushi multiple domains 1                                        | <i>csmd1</i>   | 0.78 |              | 15491766 | 421899 |
| periostin, osteoblast specific facto                                    | <i>postn</i>   | 0.78 | NM_001030541 | 15395306 | 395429 |
| BARX homeobox 2                                                         | <i>barx2</i>   | 0.79 | NM_204896    | 15474796 | 395714 |
| papilin, proteoglycan-like sulfated glycoprotei                         | <i>papln</i>   | 0.79 |              | 15521735 | 42887  |
| clone 583 noncoding RNA GGN52 gene                                      |                | 0.79 | EU240268     | 15539164 |        |
| alpha-1,4-N-acetylglucosaminyltransferase                               | <i>a4gnt</i>   | 0.80 | XM_42669     | 15545524 | 429136 |
| clone 753 GGN112 snoRN                                                  |                | 0.80 | EU240326     | 15563349 |        |
| single-minded homolog 2 (Drosophila)                                    | <i>sim2</i>    | 0.80 | XM_416724    | 15392089 | 418515 |
| collagen, type XXI, alpha 1                                             | <i>col21a1</i> | 0.80 |              | 15491621 | 421885 |
| unc-13 homolog B (C. elegans)                                           | <i>unc13</i>   | 0.80 | XR_140354    | 15557363 |        |
| leucine rich repeat containing 8 family, member B                       | <i>lrrc8b</i>  | 0.80 |              | 15543240 | 424516 |
| IQ motif containing GTPase activating protein 2                         | <i>iqgap2</i>  | 0.81 |              | 15562712 | 427211 |
| potassium voltage-gated channel, KQT-like subfamily, member             | <i>kcnq3</i>   | 0.81 |              | 15463768 | 420325 |
| family with sequence similarity 19 (chemokine (C-C motif)-like), member | <i>fam19a2</i> | 0.81 |              | 15398714 | 771745 |
| LY6/PLAUR domain containin                                              | <i>lypd6</i>   | 0.81 | XM_001234905 | 15534569 | 771649 |
| 3617 GGN113 snRNA                                                       |                | 0.81 | EU240327     | 15552097 |        |
