# Supplementary material for: Transcriptional profiles in the chicken ductus arteriosus during hatching
Source: PubMed Central journal article supplement (PMC6428269; doi:10.1371/journal.pone.0214139), 2019-03-21
Supplement: pone.0214139.s005.pdf [file pone.0214139.s005.pdf]

**S5 Table. Eleven common genes in chick and human ductus arteriosi.**

| Gene symbol    | Chicken microarray                         | literature |         |
|----------------|--------------------------------------------|------------|---------|
|                |                                            | comparison | Species |
| <i>mme</i>     | Proximal DA>distal DA                      | DA>aorta   | Human   |
| <i>Chrm2</i>   | Proximal DA>distal DA                      | DA>aorta   | Human   |
| <i>Mamdc2</i>  | Proximal DA>distal DA<br>Proximal DA>aorta | DA>aorta   | Human   |
| <i>Scube1</i>  | Distal DA>proximal DA                      | DA>aorta   | Human   |
| <i>Clqtnf3</i> | Distal DA>proximal DA                      | DA>aorta   | Human   |
| <i>Col8a1</i>  | Distal DA>aorta                            | DA>aorta   | Human   |
| <i>Hpse2</i>   | Distal DA>proximal DA<br>Aorta>proximal DA | Aorta>DA   | Human   |
| <i>Adam22</i>  | Distal DA>proximal DA                      | Aorta>DA   | Human   |
| <i>Gabrb2</i>  | Aorta>proximal DA                          | Aorta>DA   | Human   |
| <i>Fam19a2</i> | Aorta>proximal DA<br>Aorta>distal DA       | Aorta>DA   | Human   |
| <i>postn</i>   | Aorta>distal DA                            | Aorta>DA   | Human   |
